# Supplementary material
Source: MDPI journal article supplement (https://www.mdpi.com/2073-4352/2/3/1092)

# checkCIF/PLATON report

You have not supplied any structure factors. As a result the full set of tests cannot be run.

No syntax errors found.      CIF dictionary      Interpreting this report

## Datablock: TM-PDS-STP

---

Bond precision:    C-C = 0.0096 Å                      Wavelength=0.71070

Cell:                      a=5.2296(10)              b=11.006(2)              c=31.718(6)  
                                alpha=90                      beta=93.903(6)              gamma=90

Temperature:              293 K

|                | Calculated       | Reported         |
|----------------|------------------|------------------|
| Volume         | 1821.4(6)        | 1821.4(6)        |
| Space group    | P 21/n           | P 1 21/n 1       |
| Hall group     | -P 2yn           | ?                |
| Moiety formula | C14 H10 O S4 Se4 | ?                |
| Sum formula    | C14 H10 O S4 Se4 | C14 H10 O S4 Se4 |
| Mr             | 638.34           | 638.30           |
| Dx,g cm-3      | 2.328            | 2.328            |
| Z              | 4                | 4                |
| Mu (mm-1)      | 8.514            | 8.514            |
| F000           | 1208.0           | 1208.0           |
| F000'          | 1209.09          |                  |
| h,k,lmax       | 6,14,41          | 6,14,41          |
| Nref           | 4180             | 4129             |
| Tmin,Tmax      | 0.374,0.653      | 0.281,0.675      |
| Tmin'          | 0.175            |                  |

Correction method= MULTI-SCAN

Data completeness= 0.988                      Theta(max)= 27.480

R(reflections)= 0.0601( 2787)              wR2(reflections)= 0.1596( 4129)

S = 1.068                      Npar= 211

---

The following ALERTS were generated. Each ALERT has the format

**test-name\_ALERT\_alert-type\_alert-level.**

Click on the hyperlinks for more details of the test.

---

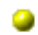

### Alert level C

|                   |                                                  |            |
|-------------------|--------------------------------------------------|------------|
| PLAT048_ALERT_1_C | MoietyFormula Not Given .....                    | ?          |
| PLAT125_ALERT_4_C | No '_symmetry_space_group_name_Hall' Given ..... | ?          |
| PLAT341_ALERT_3_C | Low Bond Precision on C-C Bonds .....            | 0.0096 Ang |

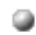

### Alert level G

PLAT005\_ALERT\_5\_G No \_iucr\_refine\_instructions\_details in CIF .... ?  
PLAT128\_ALERT\_4\_G Alternate Setting of Space-group P21/c ..... P21/n  
PLAT199\_ALERT\_1\_G Check the Reported \_cell\_measurement\_temperature 293 K  
PLAT200\_ALERT\_1\_G Check the Reported \_diffrn\_ambient\_temperature 293 K

0 **ALERT level A** = Most likely a serious problem - resolve or explain  
0 **ALERT level B** = A potentially serious problem, consider carefully  
3 **ALERT level C** = Check. Ensure it is not caused by an omission or oversight  
4 **ALERT level G** = General information/check it is not something unexpected

3 ALERT type 1 CIF construction/syntax error, inconsistent or missing data  
0 ALERT type 2 Indicator that the structure model may be wrong or deficient  
1 ALERT type 3 Indicator that the structure quality may be low  
2 ALERT type 4 Improvement, methodology, query or suggestion  
1 ALERT type 5 Informative message, check

## Datablock: TM-PDS-STP\_PF6\_PhCl

Bond precision: C-C = 0.0133 Å

Wavelength=0.71070

Cell: a=7.917(3) b=10.582(3) c=15.979(5)  
alpha=76.666(16) beta=89.916(17) gamma=89.124(19)  
Temperature: 293 K

|                | Calculated                             | Reported                         |
|----------------|----------------------------------------|----------------------------------|
| Volume         | 1302.4(7)                              | 1302.5(7)                        |
| Space group    | P -1                                   | P -1                             |
| Hall group     | -P 1                                   | ?                                |
| Moiety formula | 2(C14 H10 O S4 Se4), 2(F6 P), C6 H5 Cl | ?                                |
| Sum formula    | C34 H25 Cl F12 O2 P2 S8 Se8            | C17 H12.50 Cl10.50 F6 O P S4 Se4 |
| Mr             | 1679.17                                | 839.54                           |
| Dx, g cm-3     | 2.141                                  | 2.141                            |
| Z              | 1                                      | 2                                |
| Mu (mm-1)      | 6.121                                  | 6.121                            |
| F000           | 800.0                                  | 800.0                            |
| F000'          | 801.05                                 |                                  |
| h,k,lmax       | 10,13,20                               | 10,13,20                         |
| Nref           | 5974                                   | 5841                             |
| Tmin,Tmax      | 0.485,0.941                            | 0.206,0.294                      |
| Tmin'          | 0.291                                  |                                  |

Correction method= MULTI-SCAN

Data completeness= 0.978

Theta(max)= 27.480

R(reflections)= 0.0786( 2799)      wR2(reflections)= 0.2846( 5841)

S = 0.964

Npar= 382

---

The following ALERTS were generated. Each ALERT has the format

**test-name\_ALERT\_alert-type\_alert-level.**

Click on the hyperlinks for more details of the test.

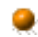

#### Alert level B

PLAT234\_ALERT\_4\_B Large Hirshfeld Difference P1      --    F3B      ..      0.30 Ang.

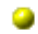

#### Alert level C

RFACR01\_ALERT\_3\_C The value of the weighted R factor is > 0.25

Weighted R factor given    0.285

|                                                                         |            |
|-------------------------------------------------------------------------|------------|
| PLAT026_ALERT_3_C Ratio Observed / Unique Reflections too Low ....      | 48 Perc.   |
| PLAT029_ALERT_3_C _diffrn_measured_fraction_theta_full Low .....        | 0.977      |
| PLAT045_ALERT_1_C Calculated and Reported Z Differ by .....             | 0.50 Ratio |
| PLAT048_ALERT_1_C MoietyFormula Not Given .....                         | ?          |
| PLAT084_ALERT_2_C High wR2 Value .....                                  | 0.28       |
| PLAT094_ALERT_2_C Ratio of Maximum / Minimum Residual Density ....      | 2.92       |
| PLAT125_ALERT_4_C No '_symmetry_space_group_name_Hall' Given .....      | ?          |
| PLAT234_ALERT_4_C Large Hirshfeld Difference S4      --    C14      ..  | 0.25 Ang.  |
| PLAT234_ALERT_4_C Large Hirshfeld Difference C11      --    C12      .. | 0.17 Ang.  |
| PLAT241_ALERT_2_C Check High      Ueq as Compared to Neighbors for      | 01         |
| PLAT244_ALERT_4_C Low    'Solvent' Ueq as Compared to Neighbors of      | P1         |
| PLAT250_ALERT_2_C Large U3/U1 Ratio for Average U(i,j) Tensor ....      | 2.3        |
| PLAT341_ALERT_3_C Low Bond Precision on    C-C Bonds .....              | 0.0133 Ang |

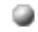

#### Alert level G

|                                                                      |            |
|----------------------------------------------------------------------|------------|
| PLAT002_ALERT_2_G Number of Distance or Angle Restraints on AtSite   | 18         |
| PLAT003_ALERT_2_G Number of Uiso or Uij Restrained Atom Sites ....   | 12         |
| PLAT005_ALERT_5_G No _iucr_refine_instructions_details in CIF ....   | ?          |
| PLAT007_ALERT_5_G Note: Number of Unrefined D-H Atoms .....          | 2          |
| PLAT072_ALERT_2_G SHELXL First    Parameter in WGHT Unusually Large. | 0.17       |
| PLAT199_ALERT_1_G Check the Reported _cell_measurement_temperature   | 293 K      |
| PLAT200_ALERT_1_G Check the Reported    _diffrn_ambient_temperature  | 293 K      |
| PLAT302_ALERT_4_G Note: Anion/Solvent Disorder .....                 | 71 Perc.   |
| PLAT779_ALERT_4_G Suspect or Irrelevant (Bond) Angle in CIF .... #   | 77         |
| F6B    -P1    -F5A      1.555    1.555    1.555                      | 40.50 Deg. |
| PLAT779_ALERT_4_G Suspect or Irrelevant (Bond) Angle in CIF .... #   | 84         |
| F5B    -P1    -F4A      1.555    1.555    1.555                      | 40.80 Deg. |
| PLAT779_ALERT_4_G Suspect or Irrelevant (Bond) Angle in CIF .... #   | 89         |
| F3A    -P1    -F4B      1.555    1.555    1.555                      | 39.00 Deg. |
| PLAT779_ALERT_4_G Suspect or Irrelevant (Bond) Angle in CIF .... #   | 108        |
| CL1    -C15    -H15      1.555    1.555    1.555                     | 8.40 Deg.  |
| PLAT779_ALERT_4_G Suspect or Irrelevant (Bond) Angle in CIF .... #   | 114        |
| CL2    -C16    -H16      1.555    1.555    1.555                     | 7.70 Deg.  |
| PLAT811_ALERT_5_G No ADDSYM Analysis: Too Many Excluded Atoms ....   | !          |
| PLAT860_ALERT_3_G Note: Number of Least-Squares Restraints .....     | 181        |

---

0 **ALERT level A** = Most likely a serious problem - resolve or explain

1 **ALERT level B** = A potentially serious problem, consider carefully

14 **ALERT level C** = Check. Ensure it is not caused by an omission or oversight

15 **ALERT level G** = General information/check it is not something unexpected

4 ALERT type 1 CIF construction/syntax error, inconsistent or missing data  
7 ALERT type 2 Indicator that the structure model may be wrong or deficient  
5 ALERT type 3 Indicator that the structure quality may be low  
11 ALERT type 4 Improvement, methodology, query or suggestion  
3 ALERT type 5 Informative message, check

---

## Datablock: TM-TPDS-STP\_PF6\_PhCl

---

Bond precision: C-C = 0.0147 Å Wavelength=0.71070

Cell: a=12.666(3) b=14.299(4) c=16.289(5)  
alpha=85.39(2) beta=88.219(19) gamma=79.788(18)  
Temperature: 293 K

|                | Calculated                 | Reported                   |
|----------------|----------------------------|----------------------------|
| Volume         | 2893.6(14)                 | 2893.6(14)                 |
| Space group    | P -1                       | P -1                       |
| Hall group     | -P 1                       | ?                          |
|                | 2(C14 H10 S5 Se4), 0.5(C12 |                            |
| Moiety formula | H10.02 Cl2), C6 H5 Cl,     | ?                          |
|                | 2(F6 P)                    |                            |
| Sum formula    | C40 H30 Cl2 F12 P2 S10 Se8 | C40 H30 Cl2 F12 P2 S10 Se8 |
| Mr             | 1823.83                    | 1823.76                    |
| Dx,g cm-3      | 2.093                      | 2.093                      |
| Z              | 2                          | 2                          |
| Mu (mm-1)      | 5.631                      | 5.631                      |
| F000           | 1748.0                     | 1748.0                     |
| F000'          | 1750.84                    |                            |
| h,k,lmax       | 16,18,21                   | 16,18,21                   |
| Nref           | 13248                      | 12916                      |
| Tmin,Tmax      | 0.588,0.945                | 0.192,0.324                |
| Tmin'          | 0.425                      |                            |

Correction method= MULTI-SCAN

Data completeness= 0.975 Theta(max)= 27.460

R(reflections)= 0.0745( 6484) wR2(reflections)= 0.2674( 12916)

S = 0.974 Npar= 689

---

The following ALERTS were generated. Each ALERT has the format

**test-name\_ALERT\_alert-type\_alert-level.**

Click on the hyperlinks for more details of the test.

---

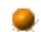

### Alert level B

PLAT241\_ALERT\_2\_B Check High

Ueq as Compared to Neighbors for

S9

|                   |                           |     |    |     |     |      |      |
|-------------------|---------------------------|-----|----|-----|-----|------|------|
| PLAT366_ALERT_2_B | Short? C(sp?)-C(sp?) Bond | C36 | -  | C37 | ... | 1.27 | Ang. |
| PLAT431_ALERT_2_B | Short Inter HL..A Contact | F3  | .. | Cl3 | .   | 2.77 | Ang. |

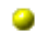

### Alert level C

RFACR01\_ALERT\_3\_C The value of the weighted R factor is > 0.25  
 Weighted R factor given 0.267

|                   |                                      |                                  |                       |            |
|-------------------|--------------------------------------|----------------------------------|-----------------------|------------|
| PLAT029_ALERT_3_C | _diffrn_measured_fraction_theta_full | Low                              | .....                 | 0.975      |
| PLAT048_ALERT_1_C | MoietyFormula                        | Not Given                        | .....                 | ?          |
| PLAT084_ALERT_2_C | High wR2 Value                       | .....                            | 0.27                  |            |
| PLAT125_ALERT_4_C | No '_symmetry_space_group_name_Hall' | Given                            | .....                 | ?          |
| PLAT220_ALERT_2_C | Large Non-Solvent                    | C                                | Ueq(max)/Ueq(min) ... | 3.2 Ratio  |
| PLAT220_ALERT_2_C | Large Non-Solvent                    | S                                | Ueq(max)/Ueq(min) ... | 3.1 Ratio  |
| PLAT234_ALERT_4_C | Large Hirshfeld Difference           | C25                              | -- C26 ..             | 0.16 Ang.  |
| PLAT241_ALERT_2_C | Check High                           | Ueq as Compared to Neighbors for | S10                   |            |
| PLAT242_ALERT_2_C | Check Low                            | Ueq as Compared to Neighbors for | C25                   |            |
| PLAT242_ALERT_2_C | Check Low                            | Ueq as Compared to Neighbors for | C38                   |            |
| PLAT242_ALERT_2_C | Check Low                            | Ueq as Compared to Neighbors for | C40                   |            |
| PLAT243_ALERT_4_C | High 'Solvent'                       | Ueq as Compared to Neighbors of  | C31                   |            |
| PLAT243_ALERT_4_C | High 'Solvent'                       | Ueq as Compared to Neighbors of  | C33                   |            |
| PLAT244_ALERT_4_C | Low 'Solvent'                        | Ueq as Compared to Neighbors of  | C29                   |            |
| PLAT244_ALERT_4_C | Low 'Solvent'                        | Ueq as Compared to Neighbors of  | C32                   |            |
| PLAT244_ALERT_4_C | Low 'Solvent'                        | Ueq as Compared to Neighbors of  | C34                   |            |
| PLAT244_ALERT_4_C | Low 'Solvent'                        | Ueq as Compared to Neighbors of  | P1                    |            |
| PLAT244_ALERT_4_C | Low 'Solvent'                        | Ueq as Compared to Neighbors of  | P2                    |            |
| PLAT341_ALERT_3_C | Low Bond Precision on                | C-C Bonds                        | .....                 | 0.0147 Ang |
| PLAT366_ALERT_2_C | Short? C(sp?)-C(sp?) Bond            | C35                              | - C40 ...             | 1.34 Ang.  |
| PLAT366_ALERT_2_C | Short? C(sp?)-C(sp?) Bond            | C37                              | - C38 ...             | 1.31 Ang.  |
| PLAT431_ALERT_2_C | Short Inter HL..A Contact            | F6                               | .. Cl4 .              | 3.12 Ang.  |

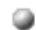

### Alert level G

FORMU01\_ALERT\_2\_G There is a discrepancy between the atom counts in the  
 \_chemical\_formula\_sum and the formula from the \_atom\_site\* data.  
 Atom count from \_chemical\_formula\_sum: C40 H30 Cl2 F12 P2 S10 Se8  
 Atom count from the \_atom\_site data: C40 H30.01 Cl1.99 F12 P2 S10 S

|                   |                                                  |                         |
|-------------------|--------------------------------------------------|-------------------------|
| PLAT002_ALERT_2_G | Number of Distance or Angle Restraints on AtSite | 16                      |
| PLAT003_ALERT_2_G | Number of Uiso or Uij Restrained Atom Sites      | .... 16                 |
| PLAT005_ALERT_5_G | No _iucr_refine_instructions_details in CIF      | .... ?                  |
| PLAT072_ALERT_2_G | SHELXL First Parameter in WGHT Unusually Large.  | 0.15                    |
| PLAT199_ALERT_1_G | Check the Reported _cell_measurement_temperature | 293 K                   |
| PLAT200_ALERT_1_G | Check the Reported _diffrn_ambient_temperature   | 293 K                   |
| PLAT301_ALERT_3_G | Note: Main Residue Disorder                      | ..... 3 Perc.           |
| PLAT432_ALERT_2_G | Short Inter X...Y Contact                        | C31 .. Cl3 .. 3.03 Ang. |
| PLAT860_ALERT_3_G | Note: Number of Least-Squares Restraints         | ..... 265               |

- 
- 0 **ALERT level A** = Most likely a serious problem - resolve or explain  
 3 **ALERT level B** = A potentially serious problem, consider carefully  
 23 **ALERT level C** = Check. Ensure it is not caused by an omission or oversight  
 10 **ALERT level G** = General information/check it is not something unexpected
- 3 ALERT type 1 CIF construction/syntax error, inconsistent or missing data  
 18 ALERT type 2 Indicator that the structure model may be wrong or deficient  
 5 ALERT type 3 Indicator that the structure quality may be low  
 9 ALERT type 4 Improvement, methodology, query or suggestion  
 1 ALERT type 5 Informative message, check
- 

## checkCIF publication errors

---

### Alert level A

PUBL008\_ALERT\_1\_A \_publ\_section\_title is missing. Title of paper.

PUBL012\_ALERT\_1\_A \_publ\_section\_abstract is missing.

Abstract of paper in English.

---

### Alert level G

PUBL013\_ALERT\_1\_G The \_publ\_section\_comment (discussion of study) is missing. This is required for a full paper submission (but is optional for an electronic paper).

PUBL017\_ALERT\_1\_G The \_publ\_section\_references section is missing or empty.

---

2 **ALERT level A** = Data missing that is essential or data in wrong format

2 **ALERT level G** = General alerts. Data that may be required is missing

---

## Publication of your CIF

You should attempt to resolve as many as possible of the alerts in all categories. Often the minor alerts point to easily fixed oversights, errors and omissions in your CIF or refinement strategy, so attention to these fine details can be worthwhile. In order to resolve some of the more serious problems it may be necessary to carry out additional measurements or structure refinements. However, the nature of your study may justify the reported deviations from journal submission requirements and the more serious of these should be commented upon in the discussion or experimental section of a paper or in the "special\_details" fields of the CIF. *checkCIF* was carefully designed to identify outliers and unusual parameters, but every test has its limitations and alerts that are not important in a particular case may appear. Conversely, the absence of alerts does not guarantee there are no aspects of the results needing attention. It is up to the individual to critically assess their own results and, if necessary, seek expert advice.

If level A alerts remain, which you believe to be justified deviations, and you intend to submit this CIF for publication in Acta Crystallographica Section C or Section E, you should additionally insert an explanation in your CIF using the Validation Reply Form (VRF) below. Your explanation will be considered as part of the review process.

If you intend to submit to another section of Acta Crystallographica or Journal of Applied Crystallography or Journal of Synchrotron Radiation, you should make sure that at least a basic structural check is run on the final version of your CIF prior to submission.

```
# start Validation Reply Form
_vrf_PUBL008_GLOBAL
;
PROBLEM: _publ_section_title is missing. Title of paper.
RESPONSE: ...
;
_vrf_PUBL012_GLOBAL
;
PROBLEM: _publ_section_abstract is missing.
RESPONSE: ...
;
# end Validation Reply Form
```

If you wish to submit your CIF for publication in Acta Crystallographica Section C or E, you should upload your CIF via the web. If your CIF is to form part of a submission to another IUCr journal, you will be asked, either during electronic submission or by the Co-editor handling your paper, to upload your CIF via our web site.

**PLATON version of 19/04/2012; check.def file version of 14/04/2012**

Datablock TM-PDS-STP - ellipsoid plot

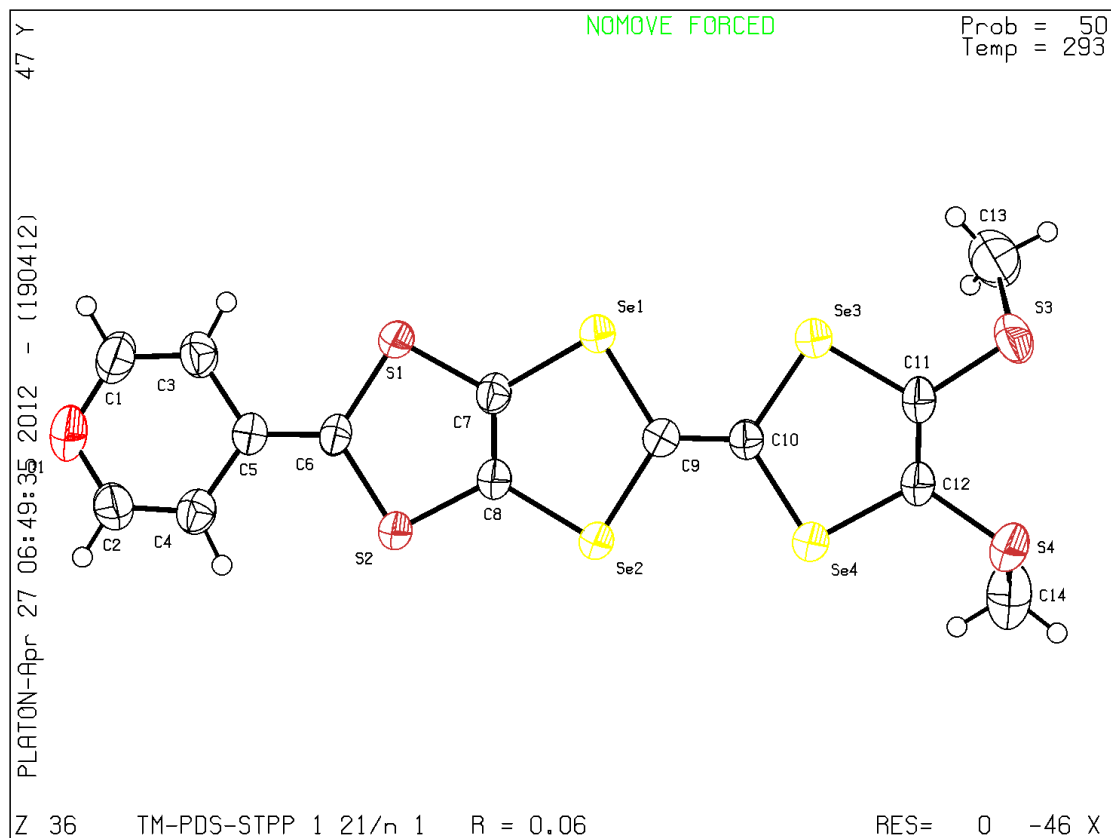

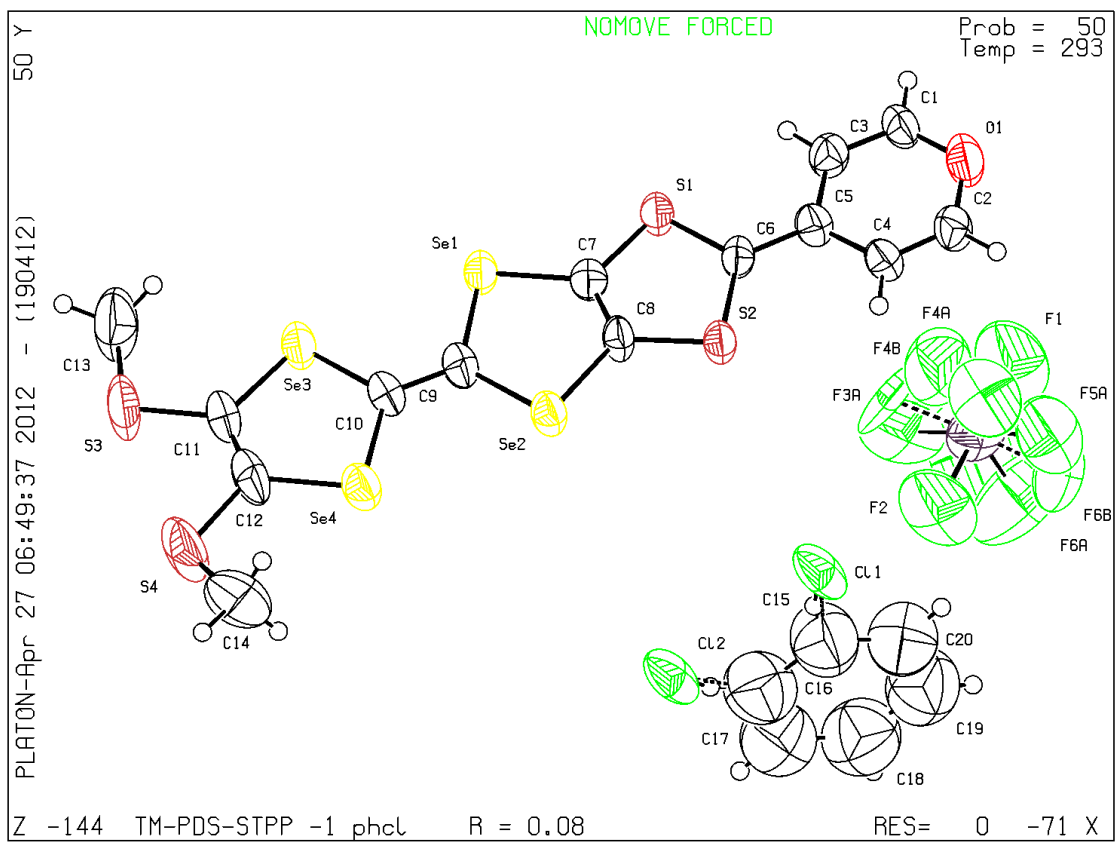

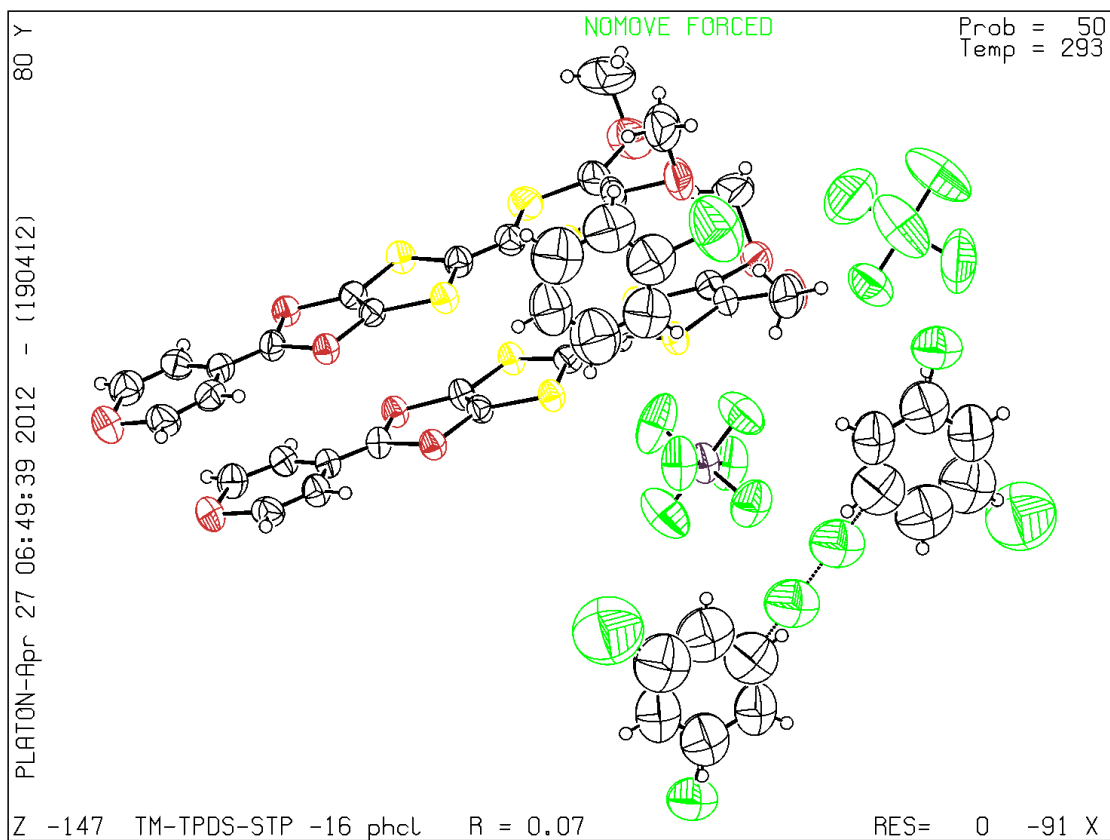

Supplement: s1 [file s1]
